# Supplementary material for: A Deep-Learning Algorithm to Predict Short-Term Progression to Geographic Atrophy on Spectral-Domain Optical Coherence Tomography
Source: PubMed Central journal article supplement (PMC10587827; doi:10.1001/jamaophthalmol.2023.4659), 2023-10-19
Supplement: jamaophthalmol-e234659-s002.pdf [file jamaophthalmol-e234659-s002.pdf]

## Data Sharing Statement

Dow. A Deep-Learning Algorithm to Predict Short-Term Progression to Geographic Atrophy on Spectral-Domain Optical Coherence Tomography. *JAMA Ophthalmol.* Published October 19, 2023. doi:10.1001/jamaophthalmol.2023.4659

### Data

**Data available:** No

### Additional Information

**Explanation for why data not available:** Non-HPI data can be shared upon request.
